# Supplementary material for: Quality indicators for patients with traumatic brain injury in European intensive care units: a CENTER-TBI study
Source: Crit Care. 2020 Mar 4;24:78. doi: 10.1186/s13054-020-2791-0 (PMC7057641; doi:10.1186/s13054-020-2791-0)
Supplement: Supplementary file 5 — Additional file 5. CENTER-TBI investigators and participants for the ICU stratum. This file includes the collaborator group: the CENTER-TBI investigators and participants for the ICU stratum and their affiliations. [file 13054_2020_2791_MOESM5_ESM.docx]

**The CENTER-TBI ICU WP6 participants and ICU ONLY investigators:**

Cecilia Åkerlund1, Krisztina Amrein 2, Nada Andelic3, Lasse Andreassen4, Gérard Audibert5, Philippe Azouvi6, Maria Luisa Azzolini7, Ronald Bartels8, Ronny Beer9, Bo‑Michael Bellander10, Habib Benali11, Maurizio Berardino12, Luigi Beretta7, Erta Beqiri13, Morten Blaabjerg14, Stine Borgen Lund15, Camilla Brorsson16, Andras Buki17, Manuel Cabeleira18, Alessio Caccioppola19, Emiliana Calappi19, Maria Rosa Calvi7, Peter Cameron20, Guillermo Carbayo Lozano21, Marco Carbonara19, Ana M. Castaño‑León22, Simona Cavallo12, Giorgio Chevallard13, Arturo Chieregato13, Mark Coburn24, Jonathan Coles25, Jamie D. Cooper26, Marta Correia27, Endre Czeiter17, Marek Czosnyka18, Claire Dahyot‑Fizelier28, Paul Dark29, Véronique DeKeyser30, Vincent Degos11, Francesco Della Corte31, Hugo den Boogert8, Bart Depreitere32, Dula Dilvesi33, Abhishek Dixit34, Jens Dreier35, Guy‑Loup Dulière36, Erzsébet Ezer37, Martin Fabricius38, Kelly Foks39, Shirin Frisvold40, Alex Furmanov41, Damien Galanaud11, Dashiell Gantner20, Alexandre Ghuysen42, Lelde Giga43, Jagos Golubovic33, Pedro A. Gomez22, Francesca Grossi31, Deepak Gupta44, Iain Haitsma45, Raimund Helbok9, Eirik Helseth46, Peter J. Hutchinson47, Stefan Jankowski48, Faye Johnson49, Mladen Karan33, AngelosG. Kolias47, Daniel Kondziella38, Evgenios Koraropoulos34, Lars‑Owe Koskinen50, Noémi Kovács51, Ana Kowark24, Alfonso Lagares22, Steven Laureys52, Fiona Lecky53,54, Didier Ledoux52, Aurelie Lejeune55, Roger Lightfoot56, Alex Manara58, Costanza Martino59, Hugues Maréchal36, Julia Mattern60, Catherine McMahon61, Tomas Menovsky30, Benoit Misset52, Visakh Muraleedharan62, Lynnette Murray20, Ancuta Negru63, David Nelson1, Virginia Newcombe34, József Nyirádi2, Fabrizio Ortolano19, Jean‑François Payen64, Vincent Perlbarg11, Paolo Persona65, Wilco Peul66, Anna Piippo-Karjalainen67, Horia Ples63, Inigo Pomposo21, Jussi P. Posti68, Louis Puybasset69, Andreea Radoi70, Arminas Ragauskas71, Rahul Raj67, Jonathan Rhodes72, Sophie Richter34, Saulius Rocka71, Cecilie Roe73, Olav Roise74,75, Jeffrey V. Rosenfeld76, Christina Rosenlund77, Guy Rosenthal41, Rolf Rossaint24, Sandra Rossi65, Juan Sahuquillo70, Oddrun Sandrød79, Oliver Sakowitz60, 79, Renan Sanchez‑Porras79, Kari Schirmer-Mikalsen78, 80, Rico Frederik Schou81, Peter Smielewski18, Abayomi Sorinola82, Emmanuel Stamatakis34 Nino Stocchetti83, Nina Sundström84, Riikka Takala85, Viktória Tamás82, Tomas Tamosuitis86, Olli Tenovuo68, Matt Thomas58, Dick Tibboel77, Christos Tolias88, Tony Trapani19, CristinaMaria Tudora63, Peter Vajkoczy79, Shirley Vallance20, Egils Valeinis 43, Zoltán Vámos37, Gregory Van der Steen30, Jeroen T.J.M. van Dijck66, Thomas A. van Essen66, Roel P. J. van Wijk66, Alessia Vargiolu23, Emmanuel Vega55, Anne Vik80, 90, Rimantas Vilcinis86, Victor Volovici45, Daphne Voormolen57, Petar Vulekovic33, Guy Williams34, Stefan Winzeck34, Stefan Wolf91, Alexander Younsi60, Frederick A. Zeiler34,92, Agate Ziverte43 , Tommaso Zoerle19, Hans Clusmann93

1 Department of Physiology and Pharmacology, Section of Perioperative Medicine and Intensive Care, Karolinska Institutet, Stockholm, Sweden

2 János Szentágothai Research Centre, University of Pécs, Pécs, Hungary

3 Division of Surgery and Clinical Neuroscience, Department of Physical Medicine and Rehabilitation, Oslo University Hospital and University of Oslo, Oslo, Norway

4 Department of Neurosurgery, University Hospital Northern Norway, Tromso, Norway

5 Department of Anesthesiology & Intensive Care, University Hospital Nancy, Nancy, France

6 Raymond Poincare hospital, Assistance Publique – Hopitaux de Paris, Paris, France

7 Department of Anesthesiology & Intensive Care, S Raffaele University Hospital, Milan, Italy

8 Department of Neurosurgery, Radboud University Medical Center, Nijmegen, The Netherlands

9 Department of Neurology, Neurological Intensive Care Unit, Medical University of Innsbruck, Innsbruck, Austria

10 Department of Neurosurgery & Anesthesia & intensive care medicine, Karolinska University Hospital, Stockholm, Sweden

11 Anesthesie-Réanimation, Assistance Publique – Hopitaux de Paris, Paris, France

12 Department of Anesthesia & ICU, AOU Città della Salute e della Scienza di Torino - Orthopedic and Trauma Center, Torino, Italy

13 NeuroIntensive Care, Niguarda Hospital, Milan, Italy

14 Department of Neurology, Odense University Hospital, Odense, Denmark

15 Department of Public Health and Nursing, Faculty of Medicine and health Sciences, Norwegian University of Science and Technology, NTNU, Trondheim, Norway

**16**Department of Surgery and Perioperative Science, **Umeå University, Umeå, Sweden**

17 Department of Neurosurgery, Medical School, University of Pécs, Hungary and Neurotrauma Research Group, János Szentágothai Research Centre, University of Pécs, Hungary

18 Brain Physics Lab, Division of Neurosurgery, Dept of Clinical Neurosciences, University of Cambridge, Addenbrooke’s Hospital, Cambridge, UK

19 Neuro ICU, Fondazione IRCCS Cà Granda Ospedale Maggiore Policlinico, Milan, Italy

20 ANZIC Research Centre, Monash University, Department of Epidemiology and Preventive Medicine, Melbourne, Victoria, Australia

21 Department of Neurosurgery, Hospital of Cruces, Bilbao, Spain

22 Department of Neurosurgery, Hospital Universitario 12 de Octubre, Madrid, Spain

23 NeuroIntensive Care, ASST di Monza, Monza, Italy

24 Department of Anaesthesiology, University Hospital of Aachen, Aachen, Germany

25 Department of Anesthesia & Neurointensive Care, Cambridge University Hospital NHS Foundation Trust, Cambridge, UK

26 School of Public Health & PM, Monash University and The Alfred Hospital, Melbourne, Victoria, Australia

27 Radiology/MRI department, MRC Cognition and Brain Sciences Unit, Cambridge, UK

28 Intensive Care Unit, CHU Poitiers, Potiers, France

29 University of Manchester NIHR Biomedical Research Centre, Critical Care Directorate,  Salford Royal Hospital NHS Foundation Trust, Salford, UK.

30 Department of Neurosurgery, Antwerp University Hospital and University of Antwerp, Edegem, Belgium

31 Department of Anesthesia & Intensive Care, Maggiore Della Carità Hospital, Novara, Italy

32 Department of Neurosurgery, University Hospitals Leuven, Leuven, Belgium

33 Department of Neurosurgery, Clinical centre of Vojvodina, Faculty of Medicine, University of Novi Sad, Novi Sad, Serbia

34 Division of Anaesthesia, University of Cambridge, Addenbrooke’s Hospital, Cambridge, UK

35 Center for Stroke Research Berlin, Charité – Universitätsmedizin Berlin, corporate member of Freie Universität Berlin, Humboldt-Universität zu Berlin, and Berlin Institute of Health, Berlin, Germany

36 Intensive Care Unit, CHR Citadelle, Liège, Belgium

37 Department of Anaesthesiology and Intensive Therapy, University of Pécs, Pécs, Hungary

38 Departments of Neurology, Clinical Neurophysiology and Neuroanesthesiology, Region Hovedstaden Rigshospitalet, Copenhagen, Denmark

39 Department of Neurology, Erasmus MC, Rotterdam, the Netherlands

40 Department of Anesthesiology and Intensive care, University Hospital Northern Norway, Tromso, Norway

41 Department of Neurosurgery, Hadassah-hebrew University Medical center, Jerusalem, Israel

42 Emergency Department, CHU, Liège, Belgium

43 Neurosurgery clinic, Pauls Stradins Clinical University Hospital, Riga, Latvia

44 Department of Neurosurgery, Neurosciences Centre & JPN Apex trauma centre, All India Institute of Medical Sciences, New Delhi-110029, India

45 Department of Neurosurgery, Erasmus MC, Rotterdam, the Netherlands

46 Department of Neurosurgery, Oslo University Hospital, Oslo, Norway

47 Division of Neurosurgery, Department of Clinical Neurosciences, Addenbrooke’s Hospital & University of Cambridge, Cambridge, UK

48 Neurointensive Care , Sheffield Teaching Hospitals NHS Foundation Trust, Sheffield, UK

49 Salford Royal Hospital NHS Foundation Trust Acute Research Delivery Team, Salford, UK

**50**Department of Clinical Neuroscience, Neurosurgery, **Umeå University, Umeå, Sweden**

51 Hungarian Brain Research Program - Grant No. KTIA_13_NAP-A-II/8, University of Pécs, Pécs, Hungary

52 Cyclotron Research Center , University of Liège, Liège, Belgium

53 Centre for Urgent and Emergency Care Research (CURE), Health Services Research Section, School of Health and Related Research (ScHARR), University of Sheffield, Sheffield, UK

54 Emergency Department, Salford Royal Hospital, Salford UK

55 Department of Anesthesiology-Intensive Care, Lille University Hospital, Lille, France

56 Department of Anesthesiology & Intensive Care, University Hospitals Southhampton NHS Trust, Southhampton, UK

57 Department of Public Health, Erasmus Medical Center-University Medical Center, Rotterdam, The Netherlands

58 Intensive Care Unit, Southmead Hospital, Bristol, Bristol, UK

59 Department of Anesthesia & Intensive Care,M. Bufalini Hospital, Cesena, Italy

60 Department of Neurosurgery, University Hospital Heidelberg, Heidelberg, Germany

61 Department of Neurosurgery, The Walton centre NHS Foundation Trust, Liverpool, UK

62 Karolinska Institutet, INCF International Neuroinformatics Coordinating Facility, Stockholm, Sweden

63 Department of Neurosurgery, Emergency County Hospital Timisoara , Timisoara, Romania

64 Department of Anesthesiology & Intensive Care, University Hospital of Grenoble, Grenoble, France

65 Department of Anesthesia & Intensive Care, Azienda Ospedaliera Università di Padova, Padova, Italy

66 Dept. of Neurosurgery, Leiden University Medical Center, Leiden, The Netherlands and Dept. of Neurosurgery, Medical Center Haaglanden, The Hague, The Netherlands

67 Department of Neurosurgery, Helsinki University Central Hospital

68 Division of Clinical Neurosciences, Department of Neurosurgery and Turku Brain Injury Centre, Turku University Hospital and University of Turku, Turku, Finland

69 Department of Anesthesiology and Critical Care, Pitié -Salpêtrière Teaching Hospital, Assistance Publique, Hôpitaux de Paris and University Pierre et Marie Curie, Paris, France

70 Neurotraumatology and Neurosurgery Research Unit (UNINN), Vall d'Hebron Research Institute, Barcelona, Spain

71 Department of Neurosurgery, Kaunas University of technology and Vilnius University, Vilnius, Lithuania

72 Department of Anaesthesia, Critical Care & Pain Medicine NHS Lothian & University of Edinburg, Edinburgh, UK

73 Department of Physical Medicine and Rehabilitation, Oslo University Hospital/University of Oslo, Oslo, Norway

74 Division of Orthopedics, Oslo University Hospital, Oslo, Norway

75 Institute of Clinical Medicine, Faculty of Medicine, University of Olso, Oslo, Norway

76 National Trauma Research Institute, The Alfred Hospital, Monash University, Melbourne, Victoria, Australia

77 Department of Neurosurgery, Odense University Hospital, Odense, Denmark

78 Department of Anasthesiology and Intensive Care Medicine, St.Olavs Hospital, Trondheim University Hospital, Trondheim, Norway

79 Klinik für Neurochirurgie, Klinikum Ludwigsburg, Ludwigsburg, Germany

80 Department of Neuromedicine and Movement Science, Norwegian University of Science and Technology, NTNU, Trondheim, Norway

81 Department of Neuroanesthesia and Neurointensive Care, Odense University Hospital, Odense, Denmark

82 Department of Neurosurgery, University of Pécs, Pécs, Hungary

83 Department of Pathophysiology and Transplantation, Milan University, and Neuroscience ICU, Fondazione IRCCS Cà Granda Ospedale Maggiore Policlinico, Milano, Italy

**84**Department of Radiation Sciences, Biomedical Engineering, **Umeå University, Umeå, Sweden**

85 Perioperative Services, Intensive Care Medicine and Pain Management, Turku University Hospital and University of Turku, Turku, Finland

86 Department of Neurosurgery, Kaunas University of Health Sciences, Kaunas, Lithuania

87 Intensive Care and Department of Pediatric Surgery, Erasmus Medical Center, Sophia Children’s Hospital, Rotterdam, The Netherlands

88 Department of Neurosurgery, Kings college London, London, UK

89 Neurologie, Neurochirurgie und Psychiatrie, Charité – Universitätsmedizin Berlin, Berlin, Germany

90 Department of Neurosurgery, St.Olavs Hospital, Trondheim University Hospital, Trondheim, Norway

91 Department of Neurosurgery, Charité – Universitätsmedizin Berlin, corporate member of Freie Universität Berlin, Humboldt-Universität zu Berlin, and Berlin Institute of Health, Berlin, Germany

92 Section of Neurosurgery, Department of Surgery, Rady Faculty of Health Sciences, University of Manitoba, Winnipeg, MB, Canada

93 Department of Neurosurgery, University Hospital of Aachen, Aachen, Germany
